# Supplementary material for: Comparison of Machine Learning Techniques for Mortality Prediction in a Prospective Cohort of Older Adults
Source: MDPI journal article supplement (doi:10.3390/ijerph182312806), 2021-12-04
Supplement: s1 [file s1]

---

**Algorithm 1** Forward Selection Component Analysis

---

$Z_k = \text{FSCA}(X, K)$

1. Start with the full data  $X = (x_1, \dots, x_p)$  and  $K$  the number of variables to select. Initialize  $Z_0 = \emptyset$  and  $k = 0$ .
2. Define  $Z_{k+1}^v$  as the matrix  $Z_k$  with the addition of the variable  $x_v$ .
3. Define  $Z_{k+1}$  as:

$$\text{argmin}_v \|X - Z_{k+1}^v (Z_{k+1}^{vT} Z_{k+1}^v)^{-1} Z_{k+1}^{vT} X\|_2$$

4. Update  $k = k + 1$
  5. If  $k \leq K$  return to step 3. Otherwise output  $Z_K$ , the set of selected variables.
- 

Figure S1.A Forward Selection Component Analysis pseudo-code

---

**Algorithm 2** Monte Carlo data augmentation

---

**Require:** Set  $n$  as the number of new synthetic samples to generate. Define  $D$  as real process data matrix with length  $l$ .

**Ensure:** Matrix  $P$  containing  $n$  new artificial samples.

Generate  $n$  pseudo-random numbers, ranging between 0 and 1 and create *rand* vector to store them.

Define  $D_{min}$  and  $D_{max}$  as vectors containing the minimum and maximum values of each feature, respectively.

**For** each feature column, compute its min and max value and store them in  $D_{min}$  and  $D_{max}$ .

Compute  $P = D_{min} + (D_{max} - D_{min}) \cdot \text{rand}$ , simulated process data matrix.

Estimate the Sqr Euclidean Distances between each real data and each simulated data as:

$$Dist_{kj} = \sum \frac{(D_{j,i} - P_k)^2}{D_{jMax}}; \quad k = 1 : n \quad i = 1 : l \quad j = 1 : l$$

Define  $K$  as number of neighbours.

**For** each  $P_k$  new sample, apply  $K$  Nearest Neighbours algorithm by means of computed  $Dist_{kj}$ , to perform class prediction and assign class label.

**return**  $P$

---

Figure S2.A Monte Carlo data augmentation pseudo-code
