# Supplementary material for: Comparison of Machine Learning Techniques for Mortality Prediction in a Prospective Cohort of Older Adults
Source: MDPI journal article supplement (doi:10.3390/ijerph182312806), 2021-12-04
Supplement: s1 [file s1]

| TABLE S1 ENHANCED LOGISTIC REGRESSION PERFORMANCE |       |                        |                 |                 |                 |                 |                 |                 |
|---------------------------------------------------|-------|------------------------|-----------------|-----------------|-----------------|-----------------|-----------------|-----------------|
| MODEL                                             |       | AUC-ROC                | AUC-PR          | BRIER SCORE     | F1 SCORE        | ACCURACY        | RECALL          | PRECISION       |
| LR W/ SMOTE<br>W/O PROB. CAL.                     | Test  | 0.516                  | 0.251           | 0.411           | 0.080           | 0.589           | 0.436           | 0.044           |
|                                                   |       | (0.510 - 0.519)        | (0.184 - 0.308) | (0.381 - 0.442) | (0.058 - 0.098) | (0.557 - 0.625) | (0.321 - 0.550) | (0.033 - 0.055) |
|                                                   | Train | 0.574                  | 0.087           | 0.384           | 0.099           | 0.616           | 0.497           | 0.055           |
|                                                   |       | (0.559 - 0.590)        | (0.071 - 0.103) | (0.363 - 0.402) | (0.095 - 0.103) | (0.602 - 0.632) | (0.489 - 0.504) | (0.053 - 0.059) |
| LR W/ ADASYN<br>W/O PROB. CAL.                    | Test  | 0.532                  | 0.270           | 0.411           | 0.086           | 0.589           | 0.471           | 0.048           |
|                                                   |       | (0.510 - 0.557)        | (0.219 - 0.321) | (0.387 - 0.444) | (0.068 - 0.103) | (0.553 - 0.618) | (0.382 - 0.571) | (0.038 - 0.058) |
|                                                   | Train | 0.559                  | 0.092           | 0.390           | 0.094           | 0.610           | 0.471           | 0.052           |
|                                                   |       | (0.546 - 0.573)        | (0.073 - 0.109) | (0.376 - 0.399) | (0.091 - 0.097) | (0.601 - 0.620) | (0.447 - 0.486) | (0.051 - 0.054) |
| LR W/ SMOTEENN<br>W/O PROB. CAL.                  | Test  | 0.514                  | 0.296           | 0.499           | 0.080           | 0.501           | 0.528           | 0.043           |
|                                                   |       | (0.509 - 0.524)        | (0.229 - 0.365) | (0.434 - 0.557) | (0.064 - 0.095) | (0.435 - 0.566) | (0.413 - 0.647) | (0.035 - 0.054) |
|                                                   | Train | 0.568                  | 0.083           | 0.522           | 0.091           | 0.478           | 0.609           | 0.049           |
|                                                   |       | (0.553 - 0.585)        | (0.068 - 0.096) | (0.489 - 0.548) | (0.086 - 0.097) | (0.454 - 0.505) | (0.577 - 0.640) | (0.047 - 0.053) |
| LR W/ RUS<br>W/O PROB. CAL.                       | Test  | 0.512                  | 0.270           | 0.477           | 0.076           | 0.523           | 0.479           | 0.041           |
|                                                   |       | (0.508 - 0.516)        | (0.220 - 0.316) | (0.443 - 0.510) | (0.063 - 0.091) | (0.487 - 0.562) | (0.364 - 0.564) | (0.033 - 0.051) |
|                                                   | Train | 0.550                  | 0.084           | 0.483           | 0.094           | 0.517           | 0.582           | 0.051           |
|                                                   |       | (0.537 - 0.566)        | (0.069 - 0.098) | (0.468 - 0.499) | (0.090 - 0.098) | (0.501 - 0.530) | (0.574 - 0.591) | (0.048 - 0.054) |
| LR W/ SMOTE<br>W/ PROB. CAL.                      | Test  | 0.568                  | 0.305           | 0.402           | 0.099           | 0.598           | 0.536           | 0.054           |
|                                                   |       | (0.545 - 0.589)        | (0.285 - 0.321) | (0.363 - 0.429) | (0.090 - 0.105) | (0.571 - 0.620) | (0.500 - 0.565) | (0.049 - 0.060) |
|                                                   | Train | 0.572                  | 0.085           | 0.392           | 0.098           | 0.608           | 0.493           | 0.054           |
|                                                   |       | (0.562 - 0.579)        | (0.073 - 0.109) | (0.371 - 0.407) | (0.093 - 0.102) | (0.594 - 0.622) | (0.485 - 0.509) | (0.051 - 0.060) |
| LR W/ ADASYN<br>W/ PROB. CAL.                     | Test  | <b>0.573</b>           | 0.311           | 0.404           | 0.100           | 0.596           | 0.548           | 0.055           |
|                                                   |       | <b>(0.566 - 0.582)</b> | (0.288 - 0.339) | (0.368 - 0.438) | (0.097 - 0.102) | (0.562 - 0.620) | (0.500 - 0.596) | (0.054 - 0.056) |
|                                                   | Train | 0.580                  | 0.078           | 0.397           | 0.095           | 0.603           | 0.488           | 0.053           |
|                                                   |       | (0.570 - 0.587)        | (0.062 - 0.109) | (0.388 - 0.405) | (0.093 - 0.098) | (0.595 - 0.610) | (0.471 - 0.517) | (0.050 - 0.054) |
| LR W/ SMOTEENN<br>W/ PROB. CAL.                   | Test  | 0.564                  | 0.349           | 0.498           | 0.095           | 0.502           | 0.631           | 0.051           |
|                                                   |       | (0.508 - 0.602)        | (0.322 - 0.392) | (0.420 - 0.569) | (0.078 - 0.105) | (0.417 - 0.556) | (0.571 - 0.697) | (0.042 - 0.056) |
|                                                   | Train | 0.567                  | 0.085           | 0.536           | 0.088           | 0.464           | 0.609           | 0.047           |
|                                                   |       | (0.563 - 0.573)        | (0.073 - 0.110) | (0.516 - 0.572) | (0.085 - 0.092) | (0.428 - 0.482) | (0.549 - 0.690) | (0.045 - 0.050) |
| LR W/ RUS<br>W/ PROB. CAL.                        | Test  | 0.510                  | 0.282           | 0.469           | 0.080           | 0.531           | 0.500           | 0.044           |
|                                                   |       | (0.507 - 0.512)        | (0.266 - 0.300) | (0.418 - 0.502) | (0.075 - 0.083) | (0.494 - 0.582) | (0.470 - 0.536) | (0.040 - 0.046) |
|                                                   | Train | 0.529                  | 0.148           | 0.475           | 0.097           | 0.525           | 0.453           | 0.053           |
|                                                   |       | (0.513 - 0.544)        | (0.139 - 0.163) | (0.377 - 0.526) | (0.092 - 0.102) | (0.476 - 0.623) | (0.314 - 0.564) | (0.049 - 0.058) |
| COST-SENSITIVE LR<br>W/ SMOTE                     | Test  | 0.526                  | 0.450           | 0.770           | 0.085           | 0.230           | 0.848           | 0.045           |
|                                                   |       | (0.515 - 0.539)        | (0.371 - 0.512) | (0.559 - 0.956) | (0.078 - 0.093) | (0.047 - 0.493) | (0.714 - 0.982) | (0.041 - 0.051) |
|                                                   | Train | 0.542                  | 0.083           | 0.682           | 0.080           | 0.318           | 0.695           | 0.043           |
|                                                   |       | (0.522 - 0.566)        | (0.057 - 0.105) | (0.409 - 0.889) | (0.069 - 0.087) | (0.047 - 0.591) | (0.439 - 0.990) | (0.039 - 0.047) |
| COST-SENSITIVE LR<br>W/ ADASYN                    | Test  | 0.535                  | 0.408           | 0.669           | 0.089           | 0.330           | 0.759           | 0.048           |
|                                                   |       | (0.418 - 0.554)        | (0.311 - 0.503) | (0.407 - 0.939) | (0.078 - 0.100) | (0.074 - 0.593) | (0.553 - 0.965) | (0.041 - 0.055) |
|                                                   | Train | 0.559                  | 0.088           | 0.675           | 0.088           | 0.325           | 0.739           | 0.047           |
|                                                   |       | (0.547 - 0.572)        | (0.066 - 0.110) | (0.398 - 0.887) | (0.082 - 0.093) | (0.048 - 0.601) | (0.486 - 0.990) | (0.043 - 0.052) |
| COST-SENSITIVE LR<br>W/ SMOTEENN                  | Test  | 0.536                  | 0.467           | 0.782           | 0.087           | 0.218           | 0.884           | 0.046           |
|                                                   |       | (0.517 - 0.567)        | (0.423 - 0.512) | (0.602 - 0.953) | (0.078 - 0.098) | (0.052 - 0.449) | (0.786 - 0.982) | (0.041 - 0.054) |
|                                                   | Train | 0.544                  | 0.081           | 0.742           | 0.084           | 0.258           | 0.783           | 0.045           |
|                                                   |       | (0.525 - 0.567)        | (0.055 - 0.101) | (0.538 - 0.902) | (0.082 - 0.086) | (0.052 - 0.458) | (0.587 - 0.990) | (0.043 - 0.046) |
| COST-SENSITIVE LR<br>W/ RUS                       | Test  | 0.510                  | 0.521           | 0.939           | 0.080           | 0.061           | 1.000           | 0.042           |
|                                                   |       | (0.500 - 0.523)        | (0.520 - 0.521) | (0.921 - 0.958) | (0.079 - 0.081) | (0.042 - 0.080) | (1.000 - 1.000) | (0.041 - 0.042) |
|                                                   | Train | 0.534                  | 0.079           | 0.957           | 0.082           | 0.043           | 0.996           | 0.043           |
|                                                   |       | (0.520 - 0.549)        | (0.059 - 0.097) | (0.956 - 0.957) | (0.081 - 0.082) | (0.043 - 0.044) | (0.988 - 1.000) | (0.042 - 0.043) |

LR: Logistic Regression, SMOTE: Synthetic Minority Over-sampling Technique, ADASYN: Adaptive Synthetic, RUS: Random under-Sampling, SMOTEENN: Synthetic Minority Over-sampling Technique Edited Nearest Neighbor, AUC-ROC: Area Under the Curve – Receiver Operative Curve, AUC-PR: Area Under the Curve – Precision-Recall Curve, w/: with, w/o: without, prob.cal.: probability calibration. Results obtained on test and training sets. For each metric mean value and its 95% confidence interval are reported.

| TABLE S2 ENHANCED DECISION TREE PERFORMANCE |       |                          |                          |                          |                          |                          |                          |                          |
|---------------------------------------------|-------|--------------------------|--------------------------|--------------------------|--------------------------|--------------------------|--------------------------|--------------------------|
| MODEL                                       |       | ROC-AUC                  | PR-AUC                   | BRIER SCORE              | F1 SCORE                 | ACCURACY                 | RECALL                   | PRECISION                |
| DT W/ SMOTE<br>W/O PROB. CAL.               | Test  | 0.541<br>(0.509 - 0.567) | 0.317<br>(0.123 - 0.425) | 0.486<br>(0.246 - 0.642) | 0.082<br>(0.066 - 0.101) | 0.513<br>(0.341 - 0.651) | 0.572<br>(0.179 - 0.780) | 0.045<br>(0.033 - 0.052) |
|                                             | Train | 0.552<br>(0.517 - 0.587) | 0.318<br>(0.312 - 0.330) | 0.303<br>(0.283 - 0.318) | 0.093<br>(0.087 - 0.100) | 0.697<br>(0.682 - 0.711) | 0.356<br>(0.333 - 0.378) | 0.954<br>(0.050 - 0.061) |
|                                             |       |                          |                          |                          |                          |                          |                          |                          |
| DT W/ ADASYN<br>W/O PROB. CAL.              | Test  | 0.516<br>(0.503 - 0.532) | 0.324<br>(0.246 - 0.403) | 0.550<br>(0.442 - 0.659) | 0.080<br>(0.074 - 0.085) | 0.450<br>(0.341 - 0.558) | 0.590<br>(0.429 - 0.750) | 0.042<br>(0.040 - 0.045) |
|                                             | Train | 0.524<br>(0.509 - 0.550) | 0.262<br>(0.252 - 0.272) | 0.531<br>(0.511 - 0.551) | 0.092<br>(0.084 - 0.099) | 0.669<br>(0.649 - 0.689) | 0.655<br>(0.589 - 0.721) | 0.047<br>(0.043 - 0.050) |
|                                             |       |                          |                          |                          |                          |                          |                          |                          |
| DT W/ SMOTEENN<br>W/O PROB. CAL.            | Test  | 0.533<br>(0.517 - 0.549) | 0.395<br>(0.320 - 0.470) | 0.631<br>(0.453 - 0.810) | 0.088<br>(0.083 - 0.094) | 0.369<br>(0.190 - 0.547) | 0.732<br>(0.571 - 0.893) | 0.047<br>(0.043 - 0.051) |
|                                             | Train | 0.555<br>(0.520 - 0.590) | 0.393<br>(0.387 - 0.399) | 0.387<br>(0.339 - 0.435) | 0.186<br>(0.170 - 0.201) | 0.613<br>(0.565 - 0.661) | 0.631<br>(0.489 - 0.773) | 0.048<br>(0.040 - 0.056) |
|                                             |       |                          |                          |                          |                          |                          |                          |                          |
| DT W/ RUS<br>W/O PROB. CAL.                 | Test  | 0.511<br>(0.510 - 0.512) | 0.325<br>(0.129 - 0.521) | 0.560<br>(0.185 - 0.936) | 0.077<br>(0.073 - 0.081) | 0.440<br>(0.064 - 0.815) | 0.590<br>(0.179 - 1.000) | 0.044<br>(0.042 - 0.046) |
|                                             | Train | 0.535<br>(0.516 - 0.554) | 0.228<br>(0.221 - 0.236) | 0.436<br>(0.381 - 0.491) | 0.093<br>(0.084 - 0.103) | 0.564<br>(0.509 - 0.619) | 0.506<br>(0.501 - 0.511) | 0.052<br>(0.046 - 0.059) |
|                                             |       |                          |                          |                          |                          |                          |                          |                          |
| DT W/ SMOTE<br>W/ PROB. CAL.                | Test  | 0.530<br>(0.512 - 0.545) | 0.224<br>(0.162 - 0.280) | 0.328<br>(0.261 - 0.401) | 0.084<br>(0.074 - 0.090) | 0.672<br>(0.589 - 0.723) | 0.375<br>(0.267 - 0.496) | 0.048<br>(0.042 - 0.051) |
|                                             | Train | 0.549<br>(0.520 - 0.578) | 0.261<br>(0.146 - 0.376) | 0.352<br>(0.268 - 0.452) | 0.092<br>(0.061 - 0.109) | 0.698<br>(0.588 - 0.792) | 0.435<br>(0.255 - 0.598) | 0.052<br>(0.036 - 0.061) |
|                                             |       |                          |                          |                          |                          |                          |                          |                          |
| DT W/ ADASYN<br>W/ PROB. CAL.               | Test  | 0.530<br>(0.515 - 0.551) | 0.245<br>(0.220 - 0.275) | 0.369<br>(0.326 - 0.416) | 0.085<br>(0.077 - 0.090) | 0.631<br>(0.587 - 0.682) | 0.420<br>(0.375 - 0.500) | 0.047<br>(0.043 - 0.050) |
|                                             | Train | 0.559<br>(0.517 - 0.609) | 0.191<br>(0.147 - 0.251) | 0.351<br>(0.246 - 0.545) | 0.090<br>(0.070 - 0.108) | 0.649<br>(0.498 - 0.752) | 0.500<br>(0.346 - 0.635) | 0.052<br>(0.041 - 0.062) |
|                                             |       |                          |                          |                          |                          |                          |                          |                          |
| DT W/ SMOTEENN<br>W/ PROB. CAL.             | Test  | 0.536<br>(0.509 - 0.565) | 0.391<br>(0.283 - 0.490) | 0.637<br>(0.436 - 0.859) | 0.087<br>(0.080 - 0.094) | 0.363<br>(0.124 - 0.646) | 0.723<br>(0.500 - 0.961) | 0.047<br>(0.042 - 0.051) |
|                                             | Train | 0.559<br>(0.518 - 0.601) | 0.229<br>(0.045 - 0.428) | 0.526<br>(0.371 - 0.723) | 0.092<br>(0.069 - 0.113) | 0.474<br>(0.277 - 0.671) | 0.765<br>(0.526 - 0.970) | 0.045<br>(0.032 - 0.056) |
|                                             |       |                          |                          |                          |                          |                          |                          |                          |
| DT W/ RUS<br>W/ PROB. CAL.                  | Test  | 0.508<br>(0.501 - 0.515) | 0.244<br>(0.155 - 0.398) | 0.482<br>(0.284 - 0.690) | 0.065<br>(0.054 - 0.078) | 0.518<br>(0.294 - 0.698) | 0.428<br>(0.245 - 0.741) | 0.036<br>(0.030 - 0.043) |
|                                             | Train | 0.517<br>(0.501 - 0.544) | 0.067<br>(0.047 - 0.088) | 0.470<br>(0.454 - 0.489) | 0.081<br>(0.074 - 0.089) | 0.530<br>(0.515 - 0.546) | 0.475<br>(0.427 - 0.522) | 0.045<br>(0.040 - 0.049) |
|                                             |       |                          |                          |                          |                          |                          |                          |                          |
| COST-SENSITIVE DT<br>W/ SMOTE               | Test  | 0.535<br>(0.505 - 0.564) | 0.395<br>(0.277 - 0.513) | 0.645<br>(0.450 - 0.908) | 0.087<br>(0.079 - 0.099) | 0.355<br>(0.145 - 0.592) | 0.732<br>(0.477 - 0.982) | 0.047<br>(0.042 - 0.056) |
|                                             | Train | 0.557<br>(0.507 - 0.587) | 0.235<br>(0.085 - 0.364) | 0.545<br>(0.297 - 0.792) | 0.095<br>(0.084 - 0.106) | 0.455<br>(0.208 - 0.701) | 0.625<br>(0.406 - 0.830) | 0.053<br>(0.045 - 0.061) |
|                                             |       |                          |                          |                          |                          |                          |                          |                          |
| COST-SENSITIVE DT<br>W/ ADASYN              | Test  | 0.524<br>(0.508 - 0.535) | 0.449<br>(0.355 - 0.521) | 0.775<br>(0.562 - 0.937) | 0.083<br>(0.080 - 0.085) | 0.225<br>(0.063 - 0.388) | 0.848<br>(0.652 - 1.000) | 0.044<br>(0.042 - 0.045) |
|                                             | Train | 0.529<br>(0.518 - 0.540) | 0.382<br>(0.236 - 0.544) | 0.676<br>(0.436 - 0.834) | 0.084<br>(0.077 - 0.093) | 0.324<br>(0.156 - 0.471) | 0.703<br>(0.472 - 0.854) | 0.046<br>(0.041 - 0.053) |
|                                             |       |                          |                          |                          |                          |                          |                          |                          |
| COST-SENSITIVE DT<br>W/ SMOTEENN            | Test  | 0.510<br>(0.496 - 0.523) | 0.512<br>(0.504 - 0.521) | 0.923<br>(0.881 - 0.951) | 0.080<br>(0.077 - 0.083) | 0.077<br>(0.052 - 0.119) | 0.982<br>(0.964 - 1.000) | 0.042<br>(0.040 - 0.043) |
|                                             | Train | 0.525<br>(0.508 - 0.541) | 0.420<br>(0.230 - 0.550) | 0.694<br>(0.431 - 0.838) | 0.085<br>(0.079 - 0.091) | 0.306<br>(0.162 - 0.572) | 0.839<br>(0.771 - 0.907) | 0.046<br>(0.041 - 0.049) |
|                                             |       |                          |                          |                          |                          |                          |                          |                          |
| COST-SENSITIVE DT<br>W/ RUS                 | Test  | 0.507<br>(0.500 - 0.515) | 0.504<br>(0.469 - 0.521) | 0.913<br>(0.847 - 0.959) | 0.079<br>(0.078 - 0.080) | 0.087<br>(0.041 - 0.154) | 0.964<br>(0.893 - 1.000) | 0.042<br>(0.041 - 0.042) |
|                                             | Train | 0.513<br>(0.505 - 0.521) | 0.384<br>(0.236 - 0.502) | 0.846<br>(0.719 - 0.919) | 0.082<br>(0.080 - 0.084) | 0.154<br>(0.078 - 0.281) | 0.878<br>(0.764 - 0.959) | 0.043<br>(0.042 - 0.044) |
|                                             |       |                          |                          |                          |                          |                          |                          |                          |

DT: Decision Tree, SMOTE: Synthetic Minority Over-sampling Technique, ADASYN: Adaptive Synthetic, RUS: Random under-Sampling, SMOTEENN: Synthetic Minority Over-sampling Technique Edited Nearest Neighbor, AUC-ROC: Area Under the Curve – Receiver Operative Curve, AUC-PR: Area Under the Curve – Precision-Recall Curve, w/: with, w/o: without, prob.cal.: probability calibration. Results obtained on test and training sets. For each metric mean value and its 95% confidence interval are reported.

| MODEL                            |       | AUC-ROC                                | AUC-PR                   | BRIER SCORE              | F1 SCORE                 | ACCURACY                 | RECALL                   | PRECISION                |
|----------------------------------|-------|----------------------------------------|--------------------------|--------------------------|--------------------------|--------------------------|--------------------------|--------------------------|
| RF W/ SMOTE<br>W/O PROB. CAL.    | Test  | 0.545<br>(0.521 - 0.570)               | 0.386<br>(0.368 - 0.405) | 0.610<br>(0.596 - 0.623) | 0.088<br>(0.082 - 0.094) | 0.391<br>(0.377 - 0.404) | 0.715<br>(0.679 - 0.750) | 0.046<br>(0.043 - 0.050) |
|                                  | Train | 0.565<br>(0.555 - 0.576)               | 0.372<br>(0.362 - 0.381) | 0.596<br>(0.521 - 0.672) | 0.093<br>(0.083 - 0.103) | 0.604<br>(0.528 - 0.679) | 0.703<br>(0.682 - 0.723) | 0.047<br>(0.035 - 0.058) |
|                                  |       |                                        |                          |                          |                          |                          |                          |                          |
| RF W/ ADASYN<br>W/O PROB. CAL.   | Test  | 0.516<br>(0.508 - 0.523)               | 0.333<br>(0.332 - 0.334) | 0.569<br>(0.536 - 0.601) | 0.081<br>(0.076 - 0.085) | 0.431<br>(0.399 - 0.464) | 0.607<br>(0.607 - 0.607) | 0.043<br>(0.041 - 0.046) |
|                                  | Train | 0.549<br>(0.544 - 0.554)               | 0.290<br>(0.289 - 0.290) | 0.437<br>(0.397 - 0.478) | 0.076<br>(0.071 - 0.080) | 0.563<br>(0.522 - 0.603) | 0.559<br>(0.496 - 0.622) | 0.056<br>(0.054 - 0.059) |
|                                  |       |                                        |                          |                          |                          |                          |                          |                          |
| RF W/ SMOTEENN<br>W/O PROB. CAL. | Test  | 0.532<br>(0.505 - 0.560)               | 0.461<br>(0.416 - 0.506) | 0.816<br>(0.811 - 0.820) | 0.081<br>(0.073 - 0.089) | 0.184<br>(0.180 - 0.189) | 0.875<br>(0.786 - 0.964) | 0.042<br>(0.038 - 0.047) |
|                                  | Train | 0.588<br>(0.585 - 0.591)               | 0.375<br>(0.342 - 0.409) | 0.696<br>(0.644 - 0.748) | 0.076<br>(0.076 - 0.077) | 0.304<br>(0.252 - 0.356) | 0.767<br>(0.713 - 0.821) | 0.041<br>(0.040 - 0.041) |
|                                  |       |                                        |                          |                          |                          |                          |                          |                          |
| RF W/ RUS<br>W/O PROB. CAL.      | Test  | <b>0.642</b><br><b>(0.504 - 0.781)</b> | 0.337<br>(0.121 - 0.553) | 0.308<br>(0.274 - 0.343) | 0.122<br>(0.051 - 0.193) | 0.692<br>(0.657 - 0.726) | 0.590<br>(0.179 - 1.000) | 0.068<br>(0.029 - 0.107) |
|                                  | Train | 0.666<br>(0.555 - 0.777)               | 0.174<br>(0.158 - 0.190) | 0.302<br>(0.270 - 0.335) | 0.088<br>(0.087 - 0.090) | 0.598<br>(0.565 - 0.630) | 0.562<br>(0.527 - 0.596) | 0.049<br>(0.047 - 0.051) |
|                                  |       |                                        |                          |                          |                          |                          |                          |                          |
| RF W/ SMOTE<br>W/ PROB. CAL.     | Test  | 0.532<br>(0.524 - 0.540)               | 0.309<br>(0.232 - 0.386) | 0.487<br>(0.355 - 0.619) | 0.084<br>(0.083 - 0.086) | 0.513<br>(0.381 - 0.645) | 0.553<br>(0.393 - 0.714) | 0.046<br>(0.046 - 0.046) |
|                                  | Train | 0.594<br>(0.587 - 0.600)               | 0.249<br>(0.240 - 0.257) | 0.387<br>(0.387 - 0.388) | 0.081<br>(0.077 - 0.085) | 0.613<br>(0.612 - 0.613) | 0.406<br>(0.388 - 0.424) | 0.045<br>(0.043 - 0.048) |
|                                  |       |                                        |                          |                          |                          |                          |                          |                          |
| RF W/ ADASYN<br>W/ PROB. CAL.    | Test  | 0.535<br>(0.500 - 0.571)               | 0.394<br>(0.366 - 0.422) | 0.645<br>(0.625 - 0.664) | 0.085<br>(0.077 - 0.093) | 0.356<br>(0.336 - 0.375) | 0.733<br>(0.679 - 0.786) | 0.045<br>(0.041 - 0.050) |
|                                  | Train | 0.543<br>(0.502 - 0.564)               | 0.252<br>(0.235 - 0.269) | 0.342<br>(0.203 - 0.480) | 0.079<br>(0.057 - 0.101) | 0.658<br>(0.520 - 0.797) | 0.515<br>(0.468 - 0.562) | 0.047<br>(0.031 - 0.063) |
|                                  |       |                                        |                          |                          |                          |                          |                          |                          |
| RF W/ SMOTEENN<br>W/ PROB. CAL.  | Test  | 0.567<br>(0.505 - 0.628)               | 0.379<br>(0.264 - 0.494) | 0.554<br>(0.458 - 0.649) | 0.090<br>(0.076 - 0.105) | 0.447<br>(0.351 - 0.542) | 0.697<br>(0.464 - 0.929) | 0.049<br>(0.042 - 0.056) |
|                                  | Train | 0.582<br>(0.580 - 0.584)               | 0.285<br>(0.274 - 0.296) | 0.592<br>(0.554 - 0.630) | 0.076<br>(0.073 - 0.079) | 0.408<br>(0.370 - 0.446) | 0.563<br>(0.562 - 0.564) | 0.041<br>(0.039 - 0.043) |
|                                  |       |                                        |                          |                          |                          |                          |                          |                          |
| RF W/ RUS<br>W/ PROB. CAL.       | Test  | 0.606<br>(0.597 - 0.615)               | 0.467<br>(0.441 - 0.493) | 0.640<br>(0.609 - 0.672) | 0.101<br>(0.099 - 0.102) | 0.360<br>(0.328 - 0.391) | 0.875<br>(0.821 - 0.929) | 0.053<br>(0.053 - 0.054) |
|                                  | Train | 0.593<br>(0.588 - 0.608)               | 0.349<br>(0.349 - 0.350) | 0.505<br>(0.486 - 0.525) | 0.088<br>(0.083 - 0.093) | 0.495<br>(0.475 - 0.514) | 0.760<br>(0.700 - 0.821) | 0.048<br>(0.045 - 0.050) |
|                                  |       |                                        |                          |                          |                          |                          |                          |                          |
| COST-SENSITIVE RF<br>W/ SMOTE    | Test  | 0.533<br>(0.516 - 0.550)               | 0.455<br>(0.405 - 0.505) | 0.726<br>(0.596 - 0.857) | 0.089<br>(0.084 - 0.094) | 0.274<br>(0.143 - 0.404) | 0.857<br>(0.750 - 0.964) | 0.047<br>(0.044 - 0.050) |
|                                  | Train | 0.558<br>(0.545 - 0.572)               | 0.464<br>(0.281 - 0.646) | 0.660<br>(0.472 - 0.849) | 0.071<br>(0.063 - 0.079) | 0.340<br>(0.151 - 0.528) | 0.813<br>(0.682 - 0.945) | 0.038<br>(0.035 - 0.041) |
|                                  |       |                                        |                          |                          |                          |                          |                          |                          |
| COST-SENSITIVE RF<br>W/ ADASYN   | Test  | 0.534<br>(0.533 - 0.536)               | 0.420<br>(0.334 - 0.505) | 0.696<br>(0.536 - 0.857) | 0.085<br>(0.084 - 0.085) | 0.303<br>(0.143 - 0.464) | 0.785<br>(0.607 - 0.964) | 0.045<br>(0.044 - 0.046) |
|                                  | Train | 0.569<br>(0.554 - 0.583)               | 0.253<br>(0.189 - 0.317) | 0.647<br>(0.478 - 0.817) | 0.075<br>(0.070 - 0.080) | 0.353<br>(0.183 - 0.522) | 0.626<br>(0.422 - 0.829) | 0.040<br>(0.039 - 0.042) |
|                                  |       |                                        |                          |                          |                          |                          |                          |                          |
| COST-SENSITIVE RF<br>W/ SMOTEENN | Test  | 0.515<br>(0.500 - 0.530)               | 0.461<br>(0.416 - 0.506) | 0.816<br>(0.811 - 0.820) | 0.081<br>(0.073 - 0.089) | 0.184<br>(0.180 - 0.189) | 0.875<br>(0.786 - 0.964) | 0.042<br>(0.038 - 0.047) |
|                                  | Train | 0.588<br>(0.585 - 0.591)               | 0.375<br>(0.342 - 0.409) | 0.696<br>(0.644 - 0.748) | 0.076<br>(0.076 - 0.077) | 0.304<br>(0.252 - 0.356) | 0.767<br>(0.713 - 0.821) | 0.041<br>(0.040 - 0.041) |
|                                  |       |                                        |                          |                          |                          |                          |                          |                          |
| COST-SENSITIVE RF<br>W/ RUS      | Test  | 0.506<br>(0.501 - 0.512)               | 0.512<br>(0.504 - 0.521) | 0.931<br>(0.904 - 0.958) | 0.080<br>(0.079 - 0.080) | 0.069<br>(0.042 - 0.096) | 0.982<br>(0.964 - 1.000) | 0.042<br>(0.041 - 0.042) |
|                                  | Train | 0.515<br>(0.511 - 0.519)               | 0.536<br>(0.474 - 0.598) | 0.923<br>(0.916 - 0.930) | 0.082<br>(0.082 - 0.083) | 0.077<br>(0.070 - 0.084) | 0.985<br>(0.969 - 1.000) | 0.043<br>(0.043 - 0.043) |
|                                  |       |                                        |                          |                          |                          |                          |                          |                          |

RF: Random Forest, SMOTE: Synthetic Minority Over-sampling Technique, ADASYN: Adaptive Synthetic, RUS: Random under-Sampling, SMOTEENN: Synthetic Minority Over-sampling Technique Edited Nearest Neighbor, AUC-ROC: Area Under the Curve – Receiver Operative Curve, AUC-PR: Area Under the Curve – Precision-Recall Curve, w/: with, w/o: without, prob.cal.: probability calibration. Results obtained on test and training sets. For each metric mean value and its 95% confidence interval are reported.

TABLE S4 ENHANCED ADAPTIVE BOOSTING PERFORMANCE

| MODEL                               |       | AUC-ROC                                         | AUC-PR                   | BRIER SCORE              | F1 SCORE                 | ACCURACY                 | RECALL                   | PRECISION                |
|-------------------------------------|-------|-------------------------------------------------|--------------------------|--------------------------|--------------------------|--------------------------|--------------------------|--------------------------|
| ADABOOST W/ SMOTE W/O PROB. CAL.    | Test  | 0.540<br>(0.515 - 0.590)                        | 0.375<br>(0.333 - 0.419) | 0.598<br>(0.504 - 0.731) | 0.087<br>(0.080 - 0.101) | 0.402<br>(0.269 - 0.508) | 0.691<br>(0.607 - 0.769) | 0.047<br>(0.043 - 0.055) |
|                                     | Train | 0.583<br>(0.567 - 0.595)                        | 0.324<br>(0.286 - 0.364) | 0.440<br>(0.380 - 0.498) | 0.098<br>(0.086 - 0.114) | 0.560<br>(0.520 - 0.620) | 0.575<br>(0.505 - 0.658) | 0.054<br>(0.042 - 0.063) |
| ADABOOST W/ ADASYN W/O PROB. CAL.   | Test  | 0.541<br>(0.515 - 0.590)                        | 0.375<br>(0.333 - 0.419) | 0.596<br>(0.504 - 0.726) | 0.087<br>(0.080 - 0.101) | 0.404<br>(0.274 - 0.508) | 0.691<br>(0.607 - 0.769) | 0.047<br>(0.043 - 0.055) |
|                                     | Train | 0.588<br>(0.581 - 0.594)                        | 0.316<br>(0.281 - 0.335) | 0.407<br>(0.380 - 0.459) | 0.102<br>(0.093 - 0.114) | 0.593<br>(0.566 - 0.619) | 0.555<br>(0.487 - 0.596) | 0.057<br>(0.050 - 0.064) |
| ADABOOST W/ SMOTEENN W/O PROB. CAL. | Test  | 0.518<br>(0.513 - 0.525)                        | 0.322<br>(0.265 - 0.351) | 0.541<br>(0.456 - 0.609) | 0.081<br>(0.079 - 0.082) | 0.459<br>(0.391 - 0.568) | 0.583<br>(0.464 - 0.643) | 0.043<br>(0.043 - 0.044) |
|                                     | Train | 0.580<br>(0.537 - 0.614)                        | 0.230<br>(0.150 - 0.324) | 0.469<br>(0.316 - 0.585) | 0.100<br>(0.090 - 0.113) | 0.531<br>(0.435 - 0.684) | 0.588<br>(0.483 - 0.690) | 0.055<br>(0.047 - 0.064) |
| ADABOOST W/ RUS W/O PROB. CAL.      | Test  | 0.539<br>(0.441 - 0.614)                        | 0.274<br>(0.137 - 0.386) | 0.405<br>(0.257 - 0.565) | 0.091<br>(0.061 - 0.129) | 0.595<br>(0.394 - 0.743) | 0.476<br>(0.214 - 0.714) | 0.051<br>(0.027 - 0.069) |
|                                     | Train | 0.557<br>(0.540 - 0.577)                        | 0.158<br>(0.061 - 0.286) | 0.409<br>(0.374 - 0.452) | 0.096<br>(0.093 - 0.100) | 0.591<br>(0.548 - 0.619) | 0.514<br>(0.483 - 0.537) | 0.055<br>(0.052 - 0.058) |
| ADABOOST W/ SMOTE W/ PROB. CAL.     | Test  | 0.535<br>(0.500 - 0.590)                        | 0.352<br>(0.264 - 0.419) | 0.563<br>(0.466 - 0.731) | 0.086<br>(0.077 - 0.101) | 0.437<br>(0.269 - 0.525) | 0.643<br>(0.464 - 0.769) | 0.046<br>(0.041 - 0.055) |
|                                     | Train | 0.598<br>(0.582 - 0.610)                        | 0.257<br>(0.185 - 0.304) | 0.411<br>(0.382 - 0.441) | 0.100<br>(0.086 - 0.118) | 0.589<br>(0.569 - 0.618) | 0.548<br>(0.473 - 0.594) | 0.055<br>(0.044 - 0.066) |
| ADABOOST W/ ADASYN W/ PROB. CAL.    | Test  | <b>0.543</b><br>( <b>0.520</b> - <b>0.582</b> ) | 0.364<br>(0.300 - 0.419) | 0.571<br>(0.481 - 0.726) | 0.087<br>(0.081 - 0.098) | 0.429<br>(0.274 - 0.510) | 0.667<br>(0.536 - 0.769) | 0.047<br>(0.044 - 0.053) |
|                                     | Train | 0.591<br>(0.574 - 0.599)                        | 0.154<br>(0.141 - 0.171) | 0.433<br>(0.387 - 0.469) | 0.099<br>(0.096 - 0.102) | 0.567<br>(0.537 - 0.613) | 0.553<br>(0.471 - 0.644) | 0.055<br>(0.053 - 0.057) |
| ADABOOST W/ SMOTEENN W/ PROB. CAL.  | Test  | 0.519<br>(0.504 - 0.540)                        | 0.357<br>(0.346 - 0.373) | 0.606<br>(0.506 - 0.745) | 0.083<br>(0.069 - 0.101) | 0.394<br>(0.255 - 0.508) | 0.655<br>(0.643 - 0.679) | 0.045<br>(0.038 - 0.055) |
|                                     | Train | 0.589<br>(0.570 - 0.604)                        | 0.221<br>(0.192 - 0.248) | 0.549<br>(0.491 - 0.616) | 0.099<br>(0.095 - 0.106) | 0.451<br>(0.404 - 0.509) | 0.693<br>(0.642 - 0.782) | 0.054<br>(0.050 - 0.058) |
| ADABOOST W/ RUS W/ PROB. CAL.       | Test  | 0.528<br>(0.501 - 0.554)                        | 0.274<br>(0.137 - 0.386) | 0.405<br>(0.257 - 0.565) | 0.091<br>(0.061 - 0.129) | 0.595<br>(0.394 - 0.743) | 0.476<br>(0.214 - 0.714) | 0.051<br>(0.027 - 0.069) |
|                                     | Train | 0.557<br>(0.540 - 0.577)                        | 0.158<br>(0.061 - 0.286) | 0.409<br>(0.374 - 0.452) | 0.096<br>(0.093 - 0.100) | 0.591<br>(0.548 - 0.619) | 0.514<br>(0.483 - 0.537) | 0.055<br>(0.052 - 0.058) |

AdaBoost: Adaptive Boosting, SMOTE: Synthetic Minority Over-sampling Technique, ADASYN: Adaptive Synthetic, RUS: Random under-Sampling, SMOTEENN: Synthetic Minority Over-sampling Technique Edited Nearest Neighbor, AUC-ROC: Area Under the Curve – Receiver Operative Curve, AUC-PR: Area Under the Curve – Precision-Recall Curve, w/: with, w/o: without, prob.cal.: probability calibration. Results obtained on test and training sets. For each metric mean value and its 95% confidence interval are reported.

| TABLE S5 ENHANCED LOGISTIC REGRESSION WITH DATA AUGMENTATION PERFORMANCE |       |                        |                 |                 |                 |                 |                 |                 |
|--------------------------------------------------------------------------|-------|------------------------|-----------------|-----------------|-----------------|-----------------|-----------------|-----------------|
| MODEL                                                                    |       | AUC-ROC                | AUC-PR          | BRIER SCORE     | F1 SCORE        | ACCURACY        | RECALL          | PRECISION       |
| LR W/ SMOTE<br>W/O PROB. CAL.                                            | Test  | <b>0.539</b>           | 0.262           | 0.382           | 0.089           | 0.618           | 0.453           | 0.049           |
|                                                                          |       | <b>(0.510 - 0.559)</b> | (0.247 - 0.288) | (0.361 - 0.400) | (0.078 - 0.099) | (0.585 - 0.636) | (0.429 - 0.500) | (0.045 - 0.056) |
|                                                                          | Train | 0.568                  | 0.294           | 0.379           | 0.095           | 0.621           | 0.452           | 0.053           |
|                                                                          |       | (0.515 - 0.617)        | (0.269 - 0.321) | (0.348 - 0.410) | (0.079 - 0.121) | (0.560 - 0.653) | (0.400 - 0.504) | (0.044 - 0.068) |
| LR W/ ADASYN<br>W/O PROB. CAL.                                           | Test  | <b>0.539</b>           | 0.273           | 0.403           | 0.089           | 0.597           | 0.476           | 0.049           |
|                                                                          |       | <b>(0.523 - 0.555)</b> | (0.260 - 0.288) | (0.368 - 0.432) | (0.082 - 0.097) | (0.544 - 0.627) | (0.429 - 0.500) | (0.046 - 0.055) |
|                                                                          | Train | 0.563                  | 0.287           | 0.396           | 0.096           | 0.604           | 0.475           | 0.054           |
|                                                                          |       | (0.516 - 0.617)        | (0.267 - 0.310) | (0.370 - 0.422) | (0.077 - 0.126) | (0.562 - 0.640) | (0.378 - 0.547) | (0.043 - 0.070) |
| LR W/ SMOTEENN<br>W/O PROB. CAL.                                         | Test  | 0.515                  | 0.322           | 0.547           | 0.081           | 0.453           | 0.583           | 0.043           |
|                                                                          |       | (0.505 - 0.520)        | (0.284 - 0.355) | (0.421 - 0.706) | (0.077 - 0.087) | (0.294 - 0.548) | (0.500 - 0.714) | (0.040 - 0.048) |
|                                                                          | Train | 0.556                  | 0.287           | 0.505           | 0.093           | 0.495           | 0.585           | 0.051           |
|                                                                          |       | (0.514 - 0.591)        | (0.262 - 0.317) | (0.454 - 0.556) | (0.083 - 0.109) | (0.399 - 0.552) | (0.547 - 0.613) | (0.045 - 0.059) |
| LR W/ RUS<br>W/O PROB. CAL.                                              | Test  | 0.538                  | 0.190           | 0.437           | 0.088           | 0.563           | 0.512           | 0.048           |
|                                                                          |       | (0.501 - 0.550)        | (0.152 - 0.241) | (0.416 - 0.457) | (0.066 - 0.104) | (0.543 - 0.576) | (0.393 - 0.607) | (0.038 - 0.058) |
|                                                                          | Train | 0.594                  | 0.207           | 0.427           | 0.102           | 0.573           | 0.560           | 0.056           |
|                                                                          |       | (0.538 - 0.625)        | (0.200 - 0.216) | (0.389 - 0.462) | (0.090 - 0.114) | (0.508 - 0.607) | (0.505 - 0.592) | (0.049 - 0.064) |
| LR W/ SMOTE<br>W/ PROB. CAL.                                             | Test  | 0.530                  | 0.255           | 0.389           | 0.085           | 0.611           | 0.441           | 0.047           |
|                                                                          |       | (0.523 - 0.538)        | (0.231 - 0.284) | (0.369 - 0.408) | (0.081 - 0.088) | (0.573 - 0.631) | (0.393 - 0.500) | (0.044 - 0.048) |
|                                                                          | Train | 0.559                  | 0.200           | 0.378           | 0.096           | 0.622           | 0.454           | 0.054           |
|                                                                          |       | (0.526 - 0.592)        | (0.171 - 0.233) | (0.346 - 0.409) | (0.080 - 0.122) | (0.563 - 0.658) | (0.400 - 0.503) | (0.044 - 0.069) |
| LR W/ ADASYN<br>W/ PROB. CAL.                                            | Test  | 0.524                  | 0.229           | 0.412           | 0.073           | 0.588           | 0.393           | 0.040           |
|                                                                          |       | (0.506 - 0.542)        | (0.217 - 0.246) | (0.368 - 0.440) | (0.066 - 0.079) | (0.548 - 0.616) | (0.357 - 0.429) | (0.036 - 0.045) |
|                                                                          | Train | 0.566                  | 0.201           | 0.379           | 0.103           | 0.621           | 0.459           | 0.060           |
|                                                                          |       | (0.518 - 0.614)        | (0.187 - 0.217) | (0.369 - 0.395) | (0.095 - 0.115) | (0.612 - 0.634) | (0.333 - 0.532) | (0.056 - 0.064) |
| LR W/ SMOTEENN<br>W/ PROB. CAL.                                          | Test  | 0.529                  | 0.317           | 0.509           | 0.085           | 0.491           | 0.571           | 0.046           |
|                                                                          |       | (0.509 - 0.545)        | (0.299 - 0.335) | (0.425 - 0.587) | (0.079 - 0.091) | (0.413 - 0.545) | (0.536 - 0.643) | (0.043 - 0.051) |
|                                                                          | Train | 0.565                  | 0.090           | 0.518           | 0.093           | 0.482           | 0.592           | 0.051           |
|                                                                          |       | (0.517 - 0.612)        | (0.068 - 0.118) | (0.455 - 0.581) | (0.082 - 0.109) | (0.364 - 0.552) | (0.562 - 0.615) | (0.044 - 0.059) |
| LR W/ RUS<br>W/ PROB. CAL.                                               | Test  | 0.507                  | 0.263           | 0.474           | 0.073           | 0.526           | 0.464           | 0.040           |
|                                                                          |       | (0.504 - 0.511)        | (0.210 - 0.305) | (0.434 - 0.524) | (0.066 - 0.087) | (0.476 - 0.595) | (0.357 - 0.607) | (0.036 - 0.045) |
|                                                                          | Train | 0.528                  | 0.258           | 0.412           | 0.088           | 0.588           | 0.458           | 0.049           |
|                                                                          |       | (0.507 - 0.548)        | (0.246 - 0.275) | (0.361 - 0.462) | (0.077 - 0.101) | (0.508 - 0.660) | (0.292 - 0.551) | (0.043 - 0.057) |
| COST-SENSITIVE LR<br>W/ SMOTE                                            | Test  | 0.535                  | 0.353           | 0.563           | 0.089           | 0.437           | 0.643           | 0.048           |
|                                                                          |       | (0.502 - 0.558)        | (0.263 - 0.521) | (0.365 - 0.760) | (0.079 - 0.098) | (0.044 - 0.634) | (0.429 - 1.000) | (0.043 - 0.056) |
|                                                                          | Train | 0.568                  | 0.286           | 0.580           | 0.091           | 0.420           | 0.641           | 0.050           |
|                                                                          |       | (0.507 - 0.629)        | (0.263 - 0.313) | (0.380 - 0.950) | (0.076 - 0.117) | (0.220 - 0.650) | (0.400 - 0.986) | (0.041 - 0.066) |
| COST-SENSITIVE LR<br>W/ ADASYN                                           | Test  | 0.514                  | 0.503           | 0.939           | 0.078           | 0.061           | 0.964           | 0.040           |
|                                                                          |       | (0.506 - 0.522)        | (0.468 - 0.521) | (0.901 - 0.959) | (0.076 - 0.079) | (0.041 - 0.081) | (0.893 - 1.000) | (0.039 - 0.041) |
|                                                                          | Train | 0.562                  | 0.376           | 0.778           | 0.079           | 0.222           | 0.788           | 0.042           |
|                                                                          |       | (0.519 - 0.601)        | (0.363 - 0.392) | (0.607 - 0.951) | (0.074 - 0.084) | (0.050 - 0.562) | (0.378 - 0.995) | (0.040 - 0.044) |
| COST-SENSITIVE LR<br>W/ SMOTEENN                                         | Test  | 0.528                  | 0.460           | 0.786           | 0.086           | 0.214           | 0.869           | 0.045           |
|                                                                          |       | (0.502 - 0.554)        | (0.339 - 0.521) | (0.445 - 0.956) | (0.079 - 0.097) | (0.044 - 0.385) | (0.607 - 1.000) | (0.041 - 0.054) |
|                                                                          | Train | 0.565                  | 0.384           | 0.668           | 0.090           | 0.332           | 0.732           | 0.048           |
|                                                                          |       | (0.518 - 0.613)        | (0.362 - 0.408) | (0.504 - 0.947) | (0.079 - 0.111) | (0.169 - 0.544) | (0.578 - 0.957) | (0.042 - 0.061) |
| COST-SENSITIVE LR<br>W/ RUS                                              | Test  | 0.531                  | 0.423           | 0.792           | 0.074           | 0.208           | 0.798           | 0.039           |
|                                                                          |       | (0.511 - 0.550)        | (0.325 - 0.520) | (0.457 - 0.959) | (0.066 - 0.079) | (0.041 - 0.543) | (0.393 - 1.000) | (0.037 - 0.041) |
|                                                                          | Train | 0.583                  | 0.391           | 0.801           | 0.082           | 0.199           | 0.835           | 0.044           |
|                                                                          |       | (0.538 - 0.622)        | (0.380 - 0.401) | (0.646 - 0.956) | (0.080 - 0.085) | (0.043 - 0.508) | (0.505 - 1.000) | (0.043 - 0.045) |

LR: Logistic Regression, SMOTE: Synthetic Minority Over-sampling Technique, ADASYN: Adaptive Synthetic, RUS: Random under-Sampling, SMOTEENN: Synthetic Minority Over-sampling Technique Edited Nearest Neighbor, AUC-ROC: Area Under the Curve – Receiver Operative Curve, AUC-PR: Area Under the Curve – Precision-Recall Curve, w/: with, w/o: without, prob.cal.: probability calibration. Results obtained on test and training sets. For each metric mean value and its 95% confidence interval are reported.

| TABLE S6 ENHANCED DECISION TREE WITH DATA AUGMENTATION PERFORMANCE |       |                          |                          |                          |                          |                          |                          |                          |
|--------------------------------------------------------------------|-------|--------------------------|--------------------------|--------------------------|--------------------------|--------------------------|--------------------------|--------------------------|
| MODEL                                                              |       | AUC-ROC                  | AUC-PR                   | BRIER SCORE              | F1 SCORE                 | ACCURACY                 | RECALL                   | PRECISION                |
| DT W/ SMOTE<br>W/O PROB. CAL.                                      | Test  | 0.514<br>(0.503 - 0.525) | 0.183<br>(0.104 - 0.283) | 0.287<br>(0.107 - 0.453) | 0.066<br>(0.027 - 0.088) | 0.712<br>(0.597 - 0.893) | 0.298<br>(0.036 - 0.500) | 0.039<br>(0.025 - 0.048) |
|                                                                    | Train | 0.522<br>(0.506 - 0.537) | 0.171<br>(0.159 - 0.180) | 0.293<br>(0.284 - 0.306) | 0.079<br>(0.059 - 0.107) | 0.707<br>(0.699 - 0.720) | 0.289<br>(0.176 - 0.429) | 0.046<br>(0.034 - 0.066) |
|                                                                    | Test  | 0.519<br>(0.508 - 0.539) | 0.317<br>(0.191 - 0.521) | 0.528<br>(0.242 - 0.937) | 0.080<br>(0.068 - 0.092) | 0.472<br>(0.240 - 0.758) | 0.571<br>(0.214 - 1.000) | 0.044<br>(0.040 - 0.047) |
|                                                                    | Train | 0.536<br>(0.512 - 0.560) | 0.298<br>(0.251 - 0.360) | 0.329<br>(0.283 - 0.375) | 0.081<br>(0.070 - 0.102) | 0.671<br>(0.581 - 0.719) | 0.341<br>(0.222 - 0.446) | 0.047<br>(0.041 - 0.056) |
| DT W/ ADASYN<br>W/O PROB. CAL.                                     | Test  | 0.515<br>(0.502 - 0.527) | 0.447<br>(0.349 - 0.521) | 0.799<br>(0.701 - 0.942) | 0.079<br>(0.075 - 0.083) | 0.201<br>(0.102 - 0.354) | 0.845<br>(0.643 - 1.000) | 0.041<br>(0.040 - 0.043) |
|                                                                    | Train | 0.554<br>(0.510 - 0.598) | 0.380<br>(0.366 - 0.392) | 0.361<br>(0.346 - 0.386) | 0.096<br>(0.079 - 0.116) | 0.639<br>(0.623 - 0.661) | 0.442<br>(0.289 - 0.592) | 0.054<br>(0.045 - 0.067) |
|                                                                    | Test  | 0.510<br>(0.500 - 0.518) | 0.253<br>(0.109 - 0.520) | 0.109<br>(0.057 - 0.195) | 0.053<br>(0.000 - 0.085) | 0.891<br>(0.805 - 0.959) | 0.095<br>(0.000 - 0.179) | 0.039<br>(0.014 - 0.075) |
|                                                                    | Train | 0.519<br>(0.512 - 0.529) | 0.245<br>(0.201 - 0.267) | 0.415<br>(0.310 - 0.487) | 0.081<br>(0.080 - 0.081) | 0.585<br>(0.473 - 0.657) | 0.432<br>(0.324 - 0.511) | 0.046<br>(0.045 - 0.049) |
| DT W/ SMOTE<br>W/ PROB. CAL.                                       | Test  | 0.519<br>(0.508 - 0.529) | 0.334<br>(0.208 - 0.520) | 0.256<br>(0.108 - 0.485) | 0.054<br>(0.020 - 0.089) | 0.744<br>(0.596 - 0.959) | 0.274<br>(0.100 - 0.507) | 0.030<br>(0.013 - 0.050) |
|                                                                    | Train | 0.575<br>(0.515 - 0.635) | 0.298<br>(0.243 - 0.406) | 0.245<br>(0.230 - 0.271) | 0.063<br>(0.048 - 0.088) | 0.755<br>(0.741 - 0.773) | 0.214<br>(0.133 - 0.257) | 0.055<br>(0.036 - 0.083) |
|                                                                    | Test  | 0.514<br>(0.509 - 0.519) | 0.237<br>(0.212 - 0.284) | 0.385<br>(0.294 - 0.431) | 0.080<br>(0.064 - 0.089) | 0.615<br>(0.567 - 0.661) | 0.405<br>(0.357 - 0.500) | 0.045<br>(0.037 - 0.052) |
|                                                                    | Train | 0.522<br>(0.508 - 0.536) | 0.206<br>(0.148 - 0.285) | 0.366<br>(0.232 - 0.500) | 0.069<br>(0.054 - 0.092) | 0.634<br>(0.369 - 0.770) | 0.345<br>(0.109 - 0.550) | 0.040<br>(0.034 - 0.049) |
| DT W/ ADASYN<br>W/ PROB. CAL.                                      | Test  | 0.515<br>(0.508 - 0.521) | 0.355<br>(0.282 - 0.455) | 0.636<br>(0.459 - 0.726) | 0.078<br>(0.065 - 0.088) | 0.364<br>(0.269 - 0.455) | 0.655<br>(0.500 - 0.857) | 0.041<br>(0.036 - 0.045) |
|                                                                    | Train | 0.528<br>(0.519 - 0.536) | 0.260<br>(0.252 - 0.270) | 0.479<br>(0.462 - 0.508) | 0.080<br>(0.069 - 0.087) | 0.521<br>(0.504 - 0.544) | 0.478<br>(0.397 - 0.531) | 0.044<br>(0.036 - 0.048) |
|                                                                    | Test  | 0.523<br>(0.509 - 0.534) | 0.510<br>(0.488 - 0.521) | 0.893<br>(0.828 - 0.936) | 0.082<br>(0.081 - 0.084) | 0.107<br>(0.058 - 0.172) | 0.976<br>(0.929 - 1.000) | 0.043<br>(0.042 - 0.044) |
|                                                                    | Train | 0.543<br>(0.515 - 0.571) | 0.419<br>(0.370 - 0.502) | 0.868<br>(0.828 - 0.920) | 0.083<br>(0.080 - 0.085) | 0.132<br>(0.099 - 0.179) | 0.898<br>(0.864 - 0.944) | 0.044<br>(0.043 - 0.044) |
| COST-SENSITIVE<br>DT<br>W/ SMOTE                                   | Test  | 0.521<br>(0.505 - 0.552) | 0.476<br>(0.443 - 0.521) | 0.831<br>(0.662 - 0.927) | 0.082<br>(0.079 - 0.089) | 0.169<br>(0.051 - 0.338) | 0.905<br>(0.786 - 1.000) | 0.043<br>(0.041 - 0.046) |
|                                                                    | Train | 0.595<br>(0.560 - 0.630) | 0.333<br>(0.181 - 0.516) | 0.723<br>(0.556 - 0.919) | 0.079<br>(0.071 - 0.087) | 0.277<br>(0.111 - 0.580) | 0.744<br>(0.354 - 0.986) | 0.042<br>(0.039 - 0.046) |
|                                                                    | Test  | 0.529<br>(0.505 - 0.576) | 0.454<br>(0.399 - 0.521) | 0.771<br>(0.486 - 0.927) | 0.085<br>(0.079 - 0.098) | 0.228<br>(0.051 - 0.514) | 0.857<br>(0.643 - 1.000) | 0.045<br>(0.041 - 0.051) |
|                                                                    | Train | 0.570<br>(0.549 - 0.591) | 0.398<br>(0.274 - 0.529) | 0.745<br>(0.623 - 0.885) | 0.081<br>(0.077 - 0.085) | 0.255<br>(0.133 - 0.480) | 0.760<br>(0.486 - 0.912) | 0.043<br>(0.041 - 0.045) |
| COST-SENSITIVE<br>DT<br>W/ ADASYN                                  | Test  | 0.523<br>(0.509 - 0.536) | 0.378<br>(0.304 - 0.521) | 0.723<br>(0.543 - 0.946) | 0.077<br>(0.054 - 0.097) | 0.277<br>(0.097 - 0.594) | 0.702<br>(0.536 - 1.000) | 0.041<br>(0.030 - 0.050) |
|                                                                    | Train | 0.535<br>(0.515 - 0.555) | 0.281<br>(0.141 - 0.454) | 0.711<br>(0.403 - 0.871) | 0.087<br>(0.080 - 0.095) | 0.289<br>(0.117 - 0.449) | 0.759<br>(0.507 - 0.909) | 0.047<br>(0.042 - 0.055) |
|                                                                    | Test  | 0.523<br>(0.509 - 0.536) | 0.378<br>(0.304 - 0.521) | 0.723<br>(0.543 - 0.946) | 0.077<br>(0.054 - 0.097) | 0.277<br>(0.097 - 0.594) | 0.702<br>(0.536 - 1.000) | 0.041<br>(0.030 - 0.050) |
|                                                                    | Train | 0.535<br>(0.515 - 0.555) | 0.281<br>(0.141 - 0.454) | 0.711<br>(0.403 - 0.871) | 0.087<br>(0.080 - 0.095) | 0.289<br>(0.117 - 0.449) | 0.759<br>(0.507 - 0.909) | 0.047<br>(0.042 - 0.055) |

DT: Decision Tree, SMOTE: Synthetic Minority Over-sampling Technique, ADASYN: Adaptive Synthetic, RUS: Random under-Sampling, SMOTEENN: Synthetic Minority Over-sampling Technique Edited Nearest Neighbor, AUC-ROC: Area Under the Curve – Receiver Operative Curve, AUC-PR: Area Under the Curve – Precision-Recall Curve, w/: with, w/o: without, prob.cal.: probability calibration. Results obtained on test and training sets. For each metric mean value and its 95% confidence interval are reported.

| TABLE S7 ENHANCED RANDOM FOREST WITH DATA AUGMENTATION PERFORMANCE |       |                          |                          |                          |                          |                          |                          |                          |
|--------------------------------------------------------------------|-------|--------------------------|--------------------------|--------------------------|--------------------------|--------------------------|--------------------------|--------------------------|
| MODEL                                                              |       | AUC-ROC                  | AUC-PR                   | BRIER SCORE              | F1 SCORE                 | ACCURACY                 | RECALL                   | PRECISION                |
| RF W/ SMOTE<br>W/O PROB. CAL.                                      | Test  | 0.530<br>(0.511 - 0.554) | 0.341<br>(0.237 - 0.408) | 0.551<br>(0.411 - 0.717) | 0.086<br>(0.078 - 0.097) | 0.450<br>(0.283 - 0.702) | 0.619<br>(0.393 - 0.821) | 0.047<br>(0.040 - 0.052) |
|                                                                    | Train | 0.572<br>(0.556 - 0.588) | 0.296<br>(0.268 - 0.337) | 0.392<br>(0.325 - 0.460) | 0.081<br>(0.068 - 0.101) | 0.608<br>(0.482 - 0.685) | 0.419<br>(0.244 - 0.563) | 0.050<br>(0.042 - 0.059) |
| RF W/ ADASYN<br>W/O PROB. CAL.                                     | Test  | 0.527<br>(0.505 - 0.559) | 0.374<br>(0.247 - 0.448) | 0.623<br>(0.419 - 0.871) | 0.084<br>(0.077 - 0.096) | 0.378<br>(0.129 - 0.528) | 0.691<br>(0.429 - 0.893) | 0.045<br>(0.041 - 0.048) |
|                                                                    | Train | 0.550<br>(0.506 - 0.595) | 0.363<br>(0.345 - 0.387) | 0.355<br>(0.312 - 0.377) | 0.093<br>(0.074 - 0.114) | 0.645<br>(0.621 - 0.667) | 0.404<br>(0.289 - 0.467) | 0.053<br>(0.042 - 0.067) |
| RF W/ SMOTEENN<br>W/O PROB. CAL.                                   | Test  | 0.511<br>(0.502 - 0.520) | 0.330<br>(0.157 - 0.416) | 0.655<br>(0.320 - 0.829) | 0.068<br>(0.062 - 0.074) | 0.345<br>(0.156 - 0.520) | 0.607<br>(0.250 - 0.786) | 0.037<br>(0.034 - 0.039) |
|                                                                    | Train | 0.525<br>(0.510 - 0.540) | 0.221<br>(0.174 - 0.273) | 0.639<br>(0.603 - 0.681) | 0.083<br>(0.078 - 0.089) | 0.361<br>(0.325 - 0.427) | 0.666<br>(0.612 - 0.710) | 0.044<br>(0.041 - 0.047) |
| RF W/ RUS<br>W/O PROB. CAL.                                        | Test  | 0.512<br>(0.509 - 0.515) | 0.199<br>(0.108 - 0.278) | 0.381<br>(0.256 - 0.557) | 0.065<br>(0.061 - 0.068) | 0.619<br>(0.493 - 0.819) | 0.333<br>(0.143 - 0.500) | 0.037<br>(0.037 - 0.038) |
|                                                                    | Train | 0.564<br>(0.543 - 0.596) | 0.168<br>(0.162 - 0.176) | 0.547<br>(0.493 - 0.593) | 0.091<br>(0.087 - 0.099) | 0.453<br>(0.371 - 0.498) | 0.624<br>(0.519 - 0.704) | 0.049<br>(0.047 - 0.054) |
| RF W/ SMOTE<br>W/ PROB. CAL.                                       | Test  | 0.535<br>(0.513 - 0.557) | 0.280<br>(0.176 - 0.336) | 0.402<br>(0.328 - 0.468) | 0.090<br>(0.069 - 0.123) | 0.598<br>(0.475 - 0.663) | 0.488<br>(0.286 - 0.607) | 0.050<br>(0.038 - 0.065) |
|                                                                    | Train | 0.566<br>(0.534 - 0.598) | 0.267<br>(0.249 - 0.289) | 0.344<br>(0.252 - 0.445) | 0.081<br>(0.067 - 0.102) | 0.656<br>(0.565 - 0.829) | 0.378<br>(0.133 - 0.513) | 0.047<br>(0.040 - 0.056) |
| RF W/ ADASYN<br>W/ PROB. CAL.                                      | Test  | 0.511<br>(0.509 - 0.513) | 0.191<br>(0.156 - 0.231) | 0.477<br>(0.335 - 0.652) | 0.077<br>(0.060 - 0.095) | 0.522<br>(0.348 - 0.628) | 0.500<br>(0.250 - 0.679) | 0.042<br>(0.032 - 0.049) |
|                                                                    | Train | 0.518<br>(0.509 - 0.527) | 0.176<br>(0.156 - 0.196) | 0.372<br>(0.297 - 0.447) | 0.073<br>(0.057 - 0.089) | 0.628<br>(0.551 - 0.776) | 0.356<br>(0.109 - 0.499) | 0.041<br>(0.034 - 0.049) |
| RF W/ SMOTEENN<br>W/ PROB. CAL.                                    | Test  | 0.518<br>(0.502 - 0.537) | 0.385<br>(0.366 - 0.403) | 0.661<br>(0.638 - 0.687) | 0.081<br>(0.076 - 0.085) | 0.339<br>(0.323 - 0.362) | 0.714<br>(0.679 - 0.750) | 0.043<br>(0.039 - 0.045) |
|                                                                    | Train | 0.536<br>(0.525 - 0.547) | 0.277<br>(0.246 - 0.329) | 0.459<br>(0.365 - 0.557) | 0.081<br>(0.062 - 0.101) | 0.541<br>(0.447 - 0.725) | 0.509<br>(0.156 - 0.693) | 0.045<br>(0.035 - 0.055) |
| RF W/ RUS<br>W/ PROB. CAL.                                         | Test  | 0.519<br>(0.502 - 0.536) | 0.272<br>(0.194 - 0.384) | 0.567<br>(0.504 - 0.621) | 0.064<br>(0.039 - 0.081) | 0.433<br>(0.335 - 0.496) | 0.488<br>(0.250 - 0.714) | 0.034<br>(0.024 - 0.041) |
|                                                                    | Train | 0.545<br>(0.519 - 0.571) | 0.190<br>(0.166 - 0.220) | 0.503<br>(0.465 - 0.541) | 0.089<br>(0.084 - 0.095) | 0.497<br>(0.434 - 0.549) | 0.562<br>(0.453 - 0.629) | 0.049<br>(0.046 - 0.052) |
| COST-SENSITIVE<br>RF<br>W/ SMOTE                                   | Test  | 0.530<br>(0.509 - 0.564) | 0.392<br>(0.255 - 0.486) | 0.650<br>(0.455 - 0.895) | 0.087<br>(0.079 - 0.101) | 0.351<br>(0.156 - 0.689) | 0.726<br>(0.429 - 0.929) | 0.047<br>(0.041 - 0.053) |
|                                                                    | Train | 0.555<br>(0.545 - 0.566) | 0.323<br>(0.276 - 0.394) | 0.568<br>(0.424 - 0.702) | 0.077<br>(0.075 - 0.081) | 0.432<br>(0.173 - 0.567) | 0.564<br>(0.415 - 0.707) | 0.042<br>(0.041 - 0.043) |
| COST-SENSITIVE<br>RF<br>W/ ADASYN                                  | Test  | 0.511<br>(0.502 - 0.527) | 0.509<br>(0.486 - 0.521) | 0.915<br>(0.891 - 0.935) | 0.080<br>(0.078 - 0.083) | 0.085<br>(0.051 - 0.104) | 0.976<br>(0.929 - 1.000) | 0.042<br>(0.041 - 0.043) |
|                                                                    | Train | 0.529<br>(0.510 - 0.548) | 0.307<br>(0.185 - 0.474) | 0.871<br>(0.841 - 0.917) | 0.083<br>(0.080 - 0.086) | 0.129<br>(0.099 - 0.173) | 0.904<br>(0.846 - 0.986) | 0.044<br>(0.042 - 0.045) |
| COST-SENSITIVE<br>RF<br>W/ SMOTEENN                                | Test  | 0.510<br>(0.501 - 0.518) | 0.175<br>(0.140 - 0.221) | 0.874<br>(0.801 - 0.915) | 0.078<br>(0.074 - 0.081) | 0.126<br>(0.075 - 0.199) | 0.905<br>(0.786 - 1.000) | 0.041<br>(0.039 - 0.042) |
|                                                                    | Train | 0.523<br>(0.509 - 0.537) | 0.238<br>(0.183 - 0.303) | 0.743<br>(0.657 - 0.830) | 0.084<br>(0.084 - 0.084) | 0.257<br>(0.172 - 0.427) | 0.777<br>(0.612 - 0.861) | 0.044<br>(0.044 - 0.045) |
| COST-SENSITIVE<br>RF<br>W/ RUS                                     | Test  | 0.503<br>(0.501 - 0.505) | 0.086<br>(0.057 - 0.115) | 0.894<br>(0.816 - 0.948) | 0.078<br>(0.076 - 0.079) | 0.106<br>(0.062 - 0.184) | 0.928<br>(0.821 - 1.000) | 0.041<br>(0.040 - 0.041) |
|                                                                    | Train | 0.513<br>(0.503 - 0.522) | 0.135<br>(0.080 - 0.190) | 0.817<br>(0.712 - 0.891) | 0.085<br>(0.085 - 0.086) | 0.183<br>(0.067 - 0.257) | 0.874<br>(0.746 - 0.959) | 0.045<br>(0.044 - 0.045) |

RF: Random Forest, SMOTE: Synthetic Minority Over-sampling Technique, ADASYN: Adaptive Synthetic, RUS: Random under-Sampling, SMOTEENN: Synthetic Minority Over-sampling Technique Edited Nearest Neighbor, AUC-ROC: Area Under the Curve – Receiver Operative Curve, AUC-PR: Area Under the Curve – Precision-Recall Curve, w/: with, w/o: without, prob.cal.: probability calibration. Results obtained on test and training sets. For each metric mean value and its 95% confidence interval are reported.

TABLE S8 ENHANCED ADAPTIVE BOOSTING WITH DATA AUGMENTATION PERFORMANCE

| MODEL                               |       | AUC-ROC                         | AUC-PR          | BRIER SCORE     | F1 SCORE        | ACCURACY        | RECALL          | PRECISION       |
|-------------------------------------|-------|---------------------------------|-----------------|-----------------|-----------------|-----------------|-----------------|-----------------|
| ADABOOST W/ SMOTE W/O PROB. CAL.    | Test  | 0.521                           | 0.141           | 0.531           | 0.087           | 0.469           | 0.619           | 0.047           |
|                                     |       | (0.514 - 0.528)                 | (0.046 - 0.316) | (0.411 - 0.755) | (0.075 - 0.100) | (0.245 - 0.607) | (0.429 - 0.893) | (0.040 - 0.052) |
|                                     | Train | 0.550                           | 0.109           | 0.331           | 0.108           | 0.669           | 0.437           | 0.062           |
|                                     |       | (0.524 - 0.576)                 | (0.046 - 0.203) | (0.312 - 0.345) | (0.078 - 0.149) | (0.647 - 0.683) | (0.244 - 0.557) | (0.045 - 0.086) |
| ADABOOST W/ ADASYN W/O PROB. CAL.   | Test  | 0.519                           | 0.189           | 0.710           | 0.077           | 0.290           | 0.726           | 0.041           |
|                                     |       | (0.513 - 0.525)                 | (0.097 - 0.252) | (0.612 - 0.858) | (0.072 - 0.082) | (0.142 - 0.437) | (0.536 - 0.929) | (0.039 - 0.043) |
|                                     | Train | 0.557                           | 0.260           | 0.426           | 0.098           | 0.574           | 0.515           | 0.054           |
|                                     |       | (0.525 - 0.589)                 | (0.258 - 0.264) | (0.407 - 0.444) | (0.080 - 0.121) | (0.542 - 0.598) | (0.367 - 0.599) | (0.044 - 0.067) |
| ADABOOST W/ SMOTEENN W/O PROB. CAL. | Test  | 0.512                           | 0.117           | 0.405           | 0.051           | 0.595           | 0.381           | 0.028           |
|                                     |       | (0.503 - 0.521)                 | (0.018 - 0.216) | (0.095 - 0.576) | (0.000 - 0.079) | (0.435 - 0.905) | (0.000 - 0.571) | (0.006 - 0.042) |
|                                     | Train | 0.530                           | 0.187           | 0.379           | 0.087           | 0.621           | 0.421           | 0.049           |
|                                     |       | (0.511 - 0.549)                 | (0.152 - 0.231) | (0.333 - 0.417) | (0.064 - 0.110) | (0.554 - 0.659) | (0.178 - 0.569) | (0.036 - 0.062) |
| ADABOOST W/ RUS W/O PROB. CAL.      | Test  | 0.507                           | 0.299           | 0.520           | 0.079           | 0.480           | 0.536           | 0.043           |
|                                     |       | (0.504 - 0.511)                 | (0.260 - 0.366) | (0.367 - 0.618) | (0.072 - 0.087) | (0.339 - 0.633) | (0.429 - 0.679) | (0.038 - 0.048) |
|                                     | Train | 0.536                           | 0.198           | 0.503           | 0.092           | 0.497           | 0.564           | 0.050           |
|                                     |       | (0.516 - 0.556)                 | (0.168 - 0.229) | (0.393 - 0.572) | (0.086 - 0.098) | (0.398 - 0.567) | (0.486 - 0.634) | (0.047 - 0.055) |
| ADABOOST W/ SMOTE W/ PROB. CAL.     | Test  | <b>0.529</b>                    | 0.172           | 0.422           | 0.082           | 0.578           | 0.476           | 0.046           |
|                                     |       | ( <b>0.505</b> - <b>0.554</b> ) | (0.074 - 0.255) | (0.294 - 0.600) | (0.059 - 0.097) | (0.400 - 0.680) | (0.286 - 0.786) | (0.039 - 0.052) |
|                                     | Train | 0.550                           | 0.109           | 0.367           | 0.095           | 0.633           | 0.438           | 0.054           |
|                                     |       | (0.530 - 0.570)                 | (0.062 - 0.180) | (0.312 - 0.406) | (0.074 - 0.117) | (0.573 - 0.671) | (0.238 - 0.564) | (0.041 - 0.067) |
| ADABOOST W/ ADASYN W/ PROB. CAL.    | Test  | 0.510                           | 0.117           | 0.526           | 0.081           | 0.474           | 0.571           | 0.044           |
|                                     |       | (0.503 - 0.517)                 | (0.015 - 0.196) | (0.317 - 0.741) | (0.073 - 0.087) | (0.259 - 0.615) | (0.357 - 0.857) | (0.041 - 0.048) |
|                                     | Train | 0.520                           | 0.151           | 0.415           | 0.089           | 0.585           | 0.462           | 0.049           |
|                                     |       | (0.509 - 0.531)                 | (0.142 - 0.162) | (0.394 - 0.435) | (0.075 - 0.103) | (0.547 - 0.605) | (0.356 - 0.516) | (0.041 - 0.057) |
| ADABOOST W/ SMOTEENN W/ PROB. CAL.  | Test  | 0.518                           | 0.256           | 0.604           | 0.080           | 0.396           | 0.655           | 0.043           |
|                                     |       | (0.502 - 0.544)                 | (0.146 - 0.342) | (0.441 - 0.837) | (0.074 - 0.086) | (0.163 - 0.528) | (0.429 - 0.964) | (0.040 - 0.045) |
|                                     | Train | 0.557                           | 0.289           | 0.479           | 0.091           | 0.521           | 0.542           | 0.050           |
|                                     |       | (0.530 - 0.584)                 | (0.248 - 0.345) | (0.416 - 0.514) | (0.075 - 0.110) | (0.480 - 0.555) | (0.400 - 0.645) | (0.041 - 0.060) |
| ADABOOST W/ RUS W/ PROB. CAL.       | Test  | 0.512                           | 0.135           | 0.468           | 0.103           | 0.532           | 0.595           | 0.059           |
|                                     |       | (0.511 - 0.512)                 | (0.065 - 0.272) | (0.214 - 0.651) | (0.083 - 0.141) | (0.235 - 0.786) | (0.429 - 0.893) | (0.045 - 0.079) |
|                                     | Train | 0.553                           | 0.163           | 0.393           | 0.076           | 0.607           | 0.412           | 0.043           |
|                                     |       | (0.539 - 0.567)                 | (0.146 - 0.188) | (0.360 - 0.426) | (0.054 - 0.090) | (0.564 - 0.663) | (0.327 - 0.500) | (0.030 - 0.052) |

AdaBoost: Adaptive Boosting, SMOTE: Synthetic Minority Over-sampling Technique, ADASYN: Adaptive Synthetic, RUS: Random under-Sampling, SMOTEENN: Synthetic Minority Over-sampling Technique Edited Nearest Neighbor, AUC-ROC: Area Under the Curve – Receiver Operative Curve, AUC-PR: Area Under the Curve – Precision-Recall Curve, w/: with, w/o: without, prob.cal.: probability calibration. Results obtained on test and training sets. For each metric mean value and its 95% confidence interval are reported.
